# Supplementary material for: Phosphorus-doped inverse opal g-C3N4 for efficient and selective CO generation from photocatalytic reduction of CO2
Source: Royal Society of Chemistry journal article supplement (doi:10.1039/d0cy00457j), 2020-01-01
Supplement: d0cy00457j1.pdf [file d0cy00457j1.pdf]

## Supporting Information

### Phosphorus-Doped Inverse Opal $g\text{-C}_3\text{N}_4$ for Efficient and Selective CO Generation from Photocatalytic Reduction of $\text{CO}_2$

Xiaoyue Huang<sup>a</sup>, Wenyi Gu<sup>b</sup>, Songchang Hu<sup>a</sup>, Yan Hu<sup>b</sup>, Juying Lei<sup>b,c,\*</sup>, Liang Zhou<sup>b</sup>, Lingzhi Wang<sup>a</sup>, Yongdi Liu<sup>b,c</sup>, Jinlong Zhang<sup>a,\*</sup>

<sup>a</sup> Key Laboratory for Advanced Materials and Joint International Research Laboratory of Precision Chemistry and Molecular Engineering, Feringa Nobel Prize Scientist Joint Research Center, School of Chemistry and Molecular Engineering, East China University of Science and Technology, 130 Meilong Road, Shanghai 200237, P. R. China. Email: [jlzhang@ecust.edu.cn](mailto:jlzhang@ecust.edu.cn)

<sup>b</sup> State Environmental Protection Key Laboratory of Environmental Risk Assessment and Control on Chemical Process, School of Resources and Environmental Engineering, East China University of Science and Technology, 130 Meilong Road, Shanghai 200237, P. R. China. Email: [leijuying@ecust.edu.cn](mailto:leijuying@ecust.edu.cn).

<sup>c</sup> Shanghai Institute of Pollution Control and Ecological Security, Shanghai, 200092, P.R. China.

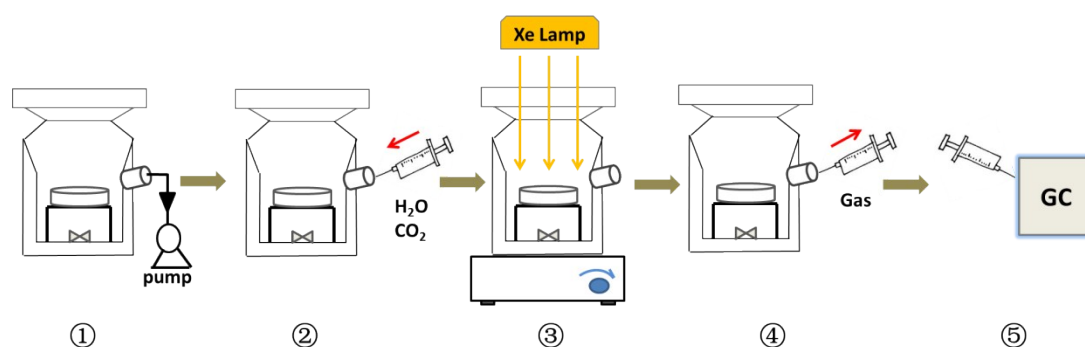

**Figure S1.** CO<sub>2</sub> photoreduction flowchart (1. Evacuate the reactor; 2. Inject 1 mL ultrapure water and 200 mL CO<sub>2</sub> into the reactor; 3. Irradiate the catalyst with Xe lamp for 4 h; 4. Extract 5 mL of reacted gas; 5. Inject gas into GC for analysis).

**The calculation of the evolution rate of CO is according to Eqs. S1:**

$$\text{CO evolution rate} = \frac{s}{S_0} * \frac{C_0 V_0}{22.4mt} \quad (\text{S1})$$

- s*: Peak area of CO in the react gas in GC;
- S<sub>0</sub>*: Peak area of CO in standard gas in GC;
- C<sub>0</sub>*: Standard gas concentration (ppm);
- V<sub>0</sub>*: The volume of the reactor (L);
- m*: The quality of the catalyst (g);
- t*: The time of irradiation (h).

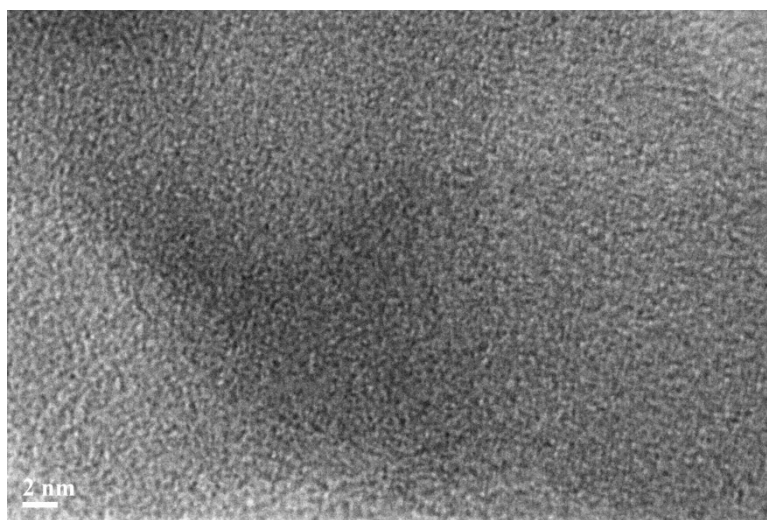

**Figure S2.** HRTEM images of P-IOCN

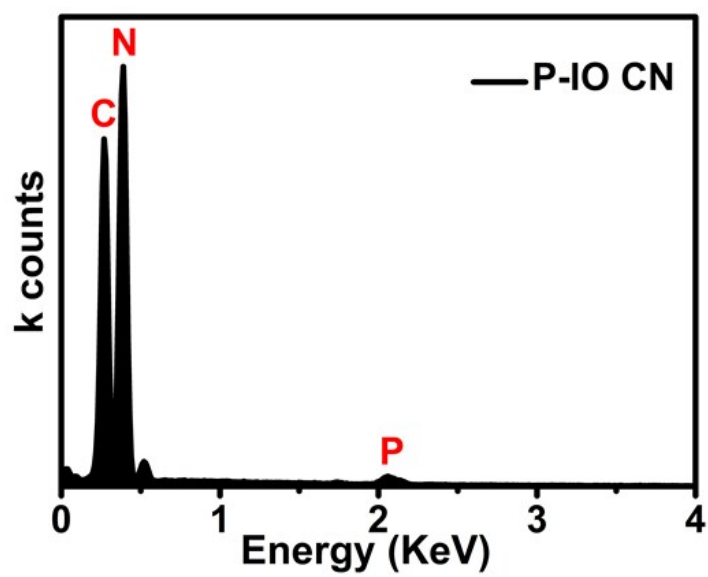

Figure S3. EDS analysis of P-IOCN

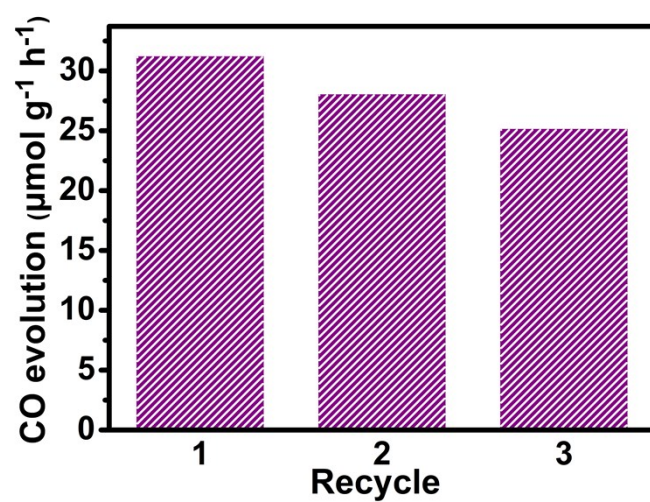

Figure S4. Cycling tests of photocatalytic CO<sub>2</sub> reduction into CO over P-IOCN

**Table S1.** Specific surface area and pore volume of the photocatalysts

| Catalyst | Surface Area(m <sup>2</sup> /g) | Pore Volume(cm <sup>3</sup> /g) |
|----------|---------------------------------|---------------------------------|
| Bulk CN  | 3.89                            | 0.034556                        |
| IO CN    | 34.19                           | 0.145081                        |
| P-IO CN  | 19.88                           | 0.123472                        |

**Table S2.** Elemental analysis and ICP-AES of P-IOCN

| Catalyst | N (wt%) | C (wt%) | P (wt%) | C/N (wt%) |
|----------|---------|---------|---------|-----------|
| IO CN    | 52.14   | 32.73   | 0       | 0.6277    |
| P-IO CN  | 52.12   | 32.09   | 0.68    | 0.6156    |

**Table S3.** Comparison of CO<sub>2</sub> photoreduction activity of the P-IO CN with other reported photocatalysts.

| Catalyst                                                                  | Catalyst amount (mg);<br>Reaction solution                                         | Light source                           | Evolution rate<br>( $\mu\text{mol g}^{-1} \text{h}^{-1}$ ) | Reference |
|---------------------------------------------------------------------------|------------------------------------------------------------------------------------|----------------------------------------|------------------------------------------------------------|-----------|
| P-IO CN                                                                   | 30 mg<br>H <sub>2</sub> O (1 mL)                                                   | 300 W Xe<br>lamp                       | CO: 31.22                                                  | This work |
| $\alpha$ -Fe <sub>2</sub> O <sub>3</sub> /g-C <sub>3</sub> N <sub>4</sub> | 25 mg<br>H <sub>2</sub> SO <sub>4</sub> (5 mL, 4 M)                                | 300 W Xe<br>lamp                       | CO: 27.2                                                   | 1         |
| Ti <sub>3</sub> C <sub>2</sub> MXene/<br>g-C <sub>3</sub> N <sub>4</sub>  | 20 mg<br>NaHCO <sub>3</sub> (1.26 g)<br>H <sub>2</sub> SO <sub>4</sub> (4 mL, 2 M) | 300 W Xe<br>lamp with<br>420 nm filter | CO: 5.2                                                    | 2         |
| Flower-like g-C <sub>3</sub> N <sub>4</sub>                               | 30 mg<br>H <sub>2</sub> O (0.5 mL)                                                 | 300 W Xe<br>lamp                       | CO: 18.8                                                   | 3         |
| ZnO/g-C <sub>3</sub> N <sub>4</sub>                                       | 100 mg<br>NaHCO <sub>3</sub> (0.12 g)<br>HCl (0.25 mL, 4 M)                        | 500 W Xe<br>lamp with<br>420 nm filter | CO: 29                                                     | 4         |
| CoZnAl-<br>LDH/RGO/g-C <sub>3</sub> N <sub>4</sub>                        | 50 mg<br>H <sub>2</sub> O (0.4 mL)                                                 | 300W Xe<br>lamp                        | CO: 10.1                                                   | 5         |
| CQDs/g-C <sub>3</sub> N <sub>4</sub>                                      | 20 mg<br>water vapor                                                               | 300W Xe<br>lamp with<br>400 nm filter  | CO: 23.4                                                   | 6         |
| WO <sub>3</sub> /g-C <sub>3</sub> N <sub>4</sub>                          | 30 mg<br>H <sub>2</sub> O (95 mL)<br>TEOA (5 mL)                                   | 300W Xe<br>lamp with<br>420 nm filter  | CO: 14.6                                                   | 7         |

## Notes and references

1. Z. Jiang, W. Wan, H. Li, S. Yuan, H. Zhao and P. K. Wong, *Advanced Materials*, 2018, **30**, 1706108.
2. C. Yang, Q. Tan, Q. Li, J. Zhou, J. Fan, B. Li, J. Sun and K. Lv, *Applied Catalysis B: Environmental*, 2020, **268**, 118738.
3. F. Li, D. Zhang and Q. Xiang, *Chemical Communications*, 2020, **56**, 2443-2446.
4. W. Yu, D. Xu and T. Peng, *Journal of Materials Chemistry A*, 2015, **3**, 19936-19947.
5. Y. Yang, J. Wu, T. Xiao, Z. Tang, J. Shen, H. Li, Y. Zhou and Z. Zou, *Applied Catalysis B: Environmental*, 2019, **255**, 117771.
6. H. Feng, Q. Guo, Y. Xu, T. Chen, Y. Zhou, Y. Wang, M. Wang and D. Shen, *ChemSusChem*, 2018, **11**, 4256-4261.
7. X. Li, X. Song, C. Ma, Y. Cheng, D. Shen, S. Zhang, W. Liu, P. Huo and H. Wang, *ACS Applied Nano Materials*, 2020, **3**, 1298-1306.
